# Supplementary material for: Efficacy of root canal treatment for autotransplanted third molars: a 6-Year cohort study of 167 teeth in southern China
Source: PeerJ. 2025 Jan 9;13:e18824. doi: 10.7717/peerj.18824 (PMC11725269; doi:10.7717/peerj.18824)
Supplement: Supplemental Information 1 [file peerj-13-18824-s001.xlsx]

## Sheet: Date
Gender	Age(y)	Follow-up(d)	Donor	Receipt	Site relationship	Reason	Extra-oral time(min)	Fixation	Filling	RCT	Prosthesis	Failure
2	24	2160	18	17	1	1	26.9	2	1	2	2	0
2	23	2133	18	46	2	1	12.6114	2	1	1	2	0
1	26	2125	38	46	3	1	19.9952	2	1	2	1	0
2	22	2056	18	46	2	1	10.1178	1	1	1	2	0
2	25	2048	48	47	1	1	20.3757	1	2	2	2	0
2	34	2012	48	17	2	1	23.2996	2	1	2	2	0
2	25	1986	28	26	1	1	13.7	2	2	2	2	0
1	31	1972	18	37	4	3	19.7897	2	2	2	2	0
2	38	1957	18	17	1	4	13.1111	2	1	2	2	0
2	26	1955	38	46	3	1	13.6846	2	1	2	2	0
2	24	1941	48	46	1	1	9.4139	2	1	2	2	0
2	22	1916	28	36	2	1	18.2922	2	1	2	2	0
1	34	1872	28	47	4	1	20.3688	2	1	2	1	0
2	38	1824	18	17	1	1	11.499	2	2	2	2	0
2	31	1819	38	37	1	1	17.9116	2	2	2	2	0
1	38	1711	48	46	1	1	17.0714	2	1	2	2	0
1	24	1705	18	46	2	1	24.839	2	2	2	2	0
2	23	1672	48	47	1	1	11.0103	2	1	2	2	0
2	26	1601	38	37	1	1	19.8371	2	1	2	2	0
2	34	861	38	46	3	1	13.7394	2	1	1	2	1
1	34	1510	38	46	3	1	15.5366	2	1	2	2	0
1	35	1487	18	27	3	1	23.0561	2	1	2	2	0
2	25	1472	38	37	1	1	19.386	2	2	2	2	0
2	48	1467	38	36	1	1	18.8006	1	1	2	2	0
2	37	1463	48	27	4	1	22.9531	2	1	2	2	0
1	24	1253	18	16	1	3	19.1229	2	1	2	2	0
1	28	1069	18	27	3	1	20.5025	2	1	2	2	1
1	33	1221	28	27	1	4	12.92	2	1	2	2	0
1	30	1220	28	47	4	1	22.1248	2	1	2	2	0
2	30	1215	28	27	1	1	13.1473	1	1	2	1	0
1	51	1204	48	47	1	1	14.7475	2	2	2	2	0
1	27	1184	38	46	3	1	25.3603	2	1	2	2	0
2	31	1182	18	46	2	1	20.4408	2	1	2	2	0
2	27	1170	38	37	1	1	11.4558	2	2	2	2	0
2	27	1156	38	36	1	1	22.8023	1	1	2	2	0
1	28	1148	38	36	1	1	9.37722	2	1	2	2	0
1	38	1127	38	36	1	3	17.239	2	2	2	2	0
1	27	1116	38	36	1	1	27.4298	2	1	2	2	0
2	24	936	28	46	4	1	16.981	2	2	2	2	1
2	26	1100	48	47	1	4	17.0328	2	2	2	2	0
2	27	1100	48	46	1	1	7.37555	2	1	2	2	0
2	36	1076	48	26	4	3	24.2663	2	1	2	1	0
1	25	1076	18	36	4	1	11.0949	2	1	2	2	0
1	38	1056	28	37	2	1	13.8101	2	2	2	2	0
2	25	1054	38	36	1	1	22.3468	1	1	2	2	0
2	26	1049	38	37	1	2	24.6913	1	1	2	2	0
2	27	1042	18	26	3	2	24.4013	1	1	2	2	0
2	31	1041	38	37	1	1	21.5879	2	1	2	2	0
2	23	1034	48	47	1	1	18.015	1	2	2	2	0
2	35	1034	28	36	2	1	28.3613	1	1	2	2	0
2	27	1029	48	46	1	1	25.0517	2	1	2	2	0
2	31	1029	28	46	4	1	17.556	1	1	2	1	0
2	27	1016	48	16	2	1	8.80063	1	1	2	2	0
2	34	996	18	16	1	1	10.0381	1	1	2	2	0
2	20	995	38	36	2	2	16.3581	1	1	1	2	0
2	20	995	28	27	1	2	16.2312	1	1	2	2	0
2	23	979	18	17	1	1	11.514	2	1	2	2	0
1	30	979	28	37	2	1	12.492	2	2	2	2	0
1	36	973	18	17	1	2	26.526	2	1	2	2	0
2	59	963	18	16	1	3	20.3227	2	2	2	2	0
2	38	958	48	47	1	2	25.0768	2	1	2	2	0
2	52	952	28	27	1	1	13.2857	1	1	2	2	0
1	23	949	48	46	1	2	9.90974	2	1	2	2	0
2	28	941	48	26	4	2	18.9742	2	1	2	1	0
2	48	935	28	47	4	2	23.899	2	1	2	1	0
2	21	931	28	46	4	3	21.7794	1	1	2	2	0
2	30	930	28	46	4	3	15.9119	2	2	2	1	0
2	43	930	38	37	1	2	11.9502	2	1	2	2	0
2	35	924	28	27	1	3	26.0009	2	1	2	2	0
2	27	923	48	36	3	1	12.973	1	1	2	1	0
2	23	920	18	36	4	1	12.202	2	1	2	2	0
2	29	920	48	46	1	3	13.3583	1	1	2	2	0
2	33	901	38	36	1	1	18.6968	1	1	2	2	0
1	28	894	18	36	4	1	8.06926	1	1	2	1	0
1	32	893	38	36	1	1	16.5755	1	1	2	2	0
2	23	882	38	36	1	1	8.89674	1	1	2	2	0
2	35	872	28	36	2	1	9.21228	1	1	2	2	0
2	31	871	18	17	1	1	22.8262	2	1	2	2	0
2	33	871	18	46	2	2	19.0768	1	1	2	2	0
2	26	866	38	36	1	1	18.3117	1	1	2	2	0
2	28	860	28	36	2	1	8.08402	1	1	2	1	0
2	24	859	18	36	4	2	21.8281	1	2	2	2	0
2	28	858	48	46	1	1	22.9324	2	2	2	2	0
1	45	853	38	37	1	1	17.5846	2	2	2	2	0
2	28	851	38	47	3	1	19.8399	2	2	2	2	0
2	38	851	28	37	2	1	17.9687	1	1	2	2	0
2	28	844	38	36	1	1	13.1011	2	1	2	1	0
2	25	823	18	36	4	2	6.47352	1	1	2	2	0
2	26	819	28	36	2	1	21.5504	1	1	2	2	0
2	23	803	28	27	1	2	7.47272	1	2	2	2	0
2	36	797	18	46	2	1	24.4985	2	1	2	2	0
2	26	788	18	17	1	1	8.39725	2	1	2	2	0
1	25	788	28	26	1	2	12.6535	1	1	2	2	0
2	28	782	28	27	1	1	15.714	2	1	2	2	0
2	32	782	48	46	1	3	18.1995	2	1	2	2	0
1	24	778	18	46	2	1	21.6987	2	2	2	1	0
2	60	777	28	27	1	3	18.3817	2	2	2	2	0
1	52	774	48	47	1	1	20.5121	2	2	2	2	0
2	24	772	18	17	1	1	15.3707	1	2	2	2	0
2	47	764	28	37	2	1	20.4182	2	1	2	2	0
2	36	760	38	36	1	3	18.9029	2	1	2	2	0
2	24	740	28	46	4	2	12.3313	1	2	2	2	0
1	26	733	28	46	4	1	13.007	1	1	2	1	0
2	39	727	18	16	1	1	17.0409	1	1	2	1	0
2	46	724	48	37	3	1	20.7495	2	1	2	2	0
2	46	676	18	26	3	1	22.8785	1	1	2	2	0
2	31	702	38	36	1	2	10.9782	1	2	2	2	0
2	53	699	38	36	1	2	26.1662	2	2	2	2	0
1	28	691	38	37	1	1	23.0847	1	2	2	2	0
2	28	683	18	36	4	2	23.1713	2	1	2	2	0
1	37	682	18	17	1	3	18.4086	2	2	2	2	0
1	37	680	48	36	3	2	18.4254	1	1	2	2	0
2	33	676	38	37	1	1	21.9717	1	2	2	2	0
2	26	675	18	36	4	1	18.5167	1	1	2	2	0
2	42	673	38	36	1	1	22.0242	1	1	2	2	0
2	29	673	38	36	1	1	13.0302	1	2	2	2	0
1	36	651	38	36	1	2	20.2233	2	1	2	2	0
1	32	610	18	16	1	1	18.9156	1	1	2	2	0
2	39	606	28	36	2	2	23.3618	1	1	2	2	0
2	26	578	18	46	2	1	17.423	2	1	2	2	0
2	24	577	38	37	1	1	19.1364	2	1	2	2	0
2	44	576	48	37	3	1	6.28171	2	1	2	2	0
2	27	568	48	47	1	1	20.9522	2	1	2	2	0
1	28	566	28	26	1	1	18.7025	1	1	2	2	0
2	32	565	48	46	1	1	17.4642	2	1	2	2	0
2	27	561	28	36	2	1	16.2581	2	1	2	2	0
1	33	556	48	47	1	1	27.3753	2	1	2	2	0
2	28	555	18	17	1	1	16.6002	1	1	2	2	0
2	33	555	48	46	1	2	11.2204	2	2	2	2	0
1	40	543	18	16	1	1	21.1083	2	1	2	2	0
1	28	526	38	36	1	1	7.38941	1	2	2	2	0
2	23	524	28	36	2	1	25.8817	1	1	2	2	0
1	31	523	28	36	2	1	16.8249	1	1	2	2	0
2	23	523	48	47	1	1	21.0644	2	2	2	2	0
2	25	494	38	37	1	1	20.5596	1	1	2	2	0
2	18	481	48	46	1	2	20.6684	2	1	1	2	0
1	29	480	38	37	1	1	28.6535	2	2	2	2	0
2	28	467	48	46	1	2	19.186	2	2	2	2	0
2	39	466	18	47	2	1	19.3077	2	2	2	2	0
2	31	463	18	47	2	1	7.90628	1	1	2	2	0
2	29	461	38	46	3	2	9.68032	1	1	2	2	0
1	18	451	48	46	1	2	7.03361	1	1	1	2	0
2	38	445	38	37	1	1	18.8857	1	1	2	2	0
2	27	438	48	47	1	2	17.7679	1	2	2	2	0
2	36	431	18	16	1	1	28.1036	2	1	2	2	0
2	23	431	28	17	3	1	26.4851	2	1	2	2	0
1	32	417	48	47	1	1	13.2957	1	1	2	2	0
2	27	372	18	27	3	2	15.673	2	1	2	2	0
2	25	370	18	47	2	2	16.8774	1	2	2	2	0
2	30	367	38	16	4	1	17.8779	2	2	2	2	0
1	27	363	38	36	1	2	27.2274	1	1	2	2	0
2	26	353	48	36	3	1	19.0524	2	1	2	2	0
2	24	327	38	36	1	1	18.7576	2	1	2	2	0
2	32	320	28	27	1	3	20.1628	2	2	2	2	0
1	32	320	38	37	1	4	15.0102	2	2	2	2	0
2	40	288	28	27	1	2	14.2379	1	2	2	2	0
2	32	265	48	26	4	3	18.6615	2	2	2	2	0
2	35	255	38	46	3	2	16.5918	2	1	2	2	0
2	34	251	28	47	4	1	9.50603	2	1	2	2	0
1	44	245	28	27	1	3	21.1012	2	1	2	2	0
1	37	236	28	37	2	1	19.8405	1	1	2	2	0
2	28	234	38	46	3	2	9.91279	1	1	2	2	0
1	49	206	48	47	1	3	28.6077	1	2	2	2	0
2	53	201	18	17	1	1	11.762	1	2	2	2	0
1	25	196	38	36	1	1	19.9879	2	2	2	2	0
2	53	189	48	47	1	1	20.2093	2	2	2	2	0
2	27	796	18	16	1	1	9.3468	2	1	1	2	1

## Sheet: Codebook
Gender	Age(y)	Follow-up(d)	Donor	Receipt	Site relationship	Reason	Extra-oral time(min)	Fixation	Filling	RCT	Prosthesis	Failure
1=Male					1=sSsJ	1=Caries and sequelae		1=Yes	1=No	1=No	1=Yes	0=success
2=Female					2=sSoJ	2=Periapical lesion		2=No	2=Yes	2=Yes	2=No	1=unsuccess
					3=oSsJ	3=Tooth fracture
					4=oSoJ	4=External resorption
